# Supplementary material for: Coffee consumption and coronary artery calcium in young and middle-aged asymptomatic adults
Source: HighWire-hosted journal article supplement (doi:10.1136/heartjnl-2014-306663), 2015-03-02
Supplement: heartjnl-2014-306663supp.pdf [file heartjnl-2014-306663supp.pdf]

**SUPPLEMENTAL MATERIAL**

**Supplemental Table 1. Coronary artery calcium (CAC) score ratios\* (95% CIs) by categories of coffee consumption in selected population subgroups**

**Supplemental Table 1. Coronary artery calcium (CAC) score ratios\* (95% CIs) by categories of coffee consumption in selected population subgroups**

|                                    | Daily coffee consumption |                     |                     |                     |                     | <i>P</i> for Interaction† |
|------------------------------------|--------------------------|---------------------|---------------------|---------------------|---------------------|---------------------------|
|                                    | None                     | < 1 cup             | 1 – < 3 cups        | 3 – < 5 cups        | ≥ 5 cups            |                           |
| <b>Age, years</b>                  |                          |                     |                     |                     |                     |                           |
| < 40 (N=10 527)                    | 1.00                     | 0.79 (0.28-2.25)    | 0.68 (0.24-1.90)    | 0.73 (0.25-2.15)    | 1.05 (0.25-4.41)    | 0.06                      |
| ≥ 40 (N =14 611)                   | 1.00                     | 0.73 (0.44-1.21)    | 0.62 (0.38-1.01)    | 0.51 (0.31-0.85)    | 0.70 (0.37-1.31)    |                           |
| <b>Sex</b>                         |                          |                     |                     |                     |                     |                           |
| Men (N = 21 033)                   | 1.00                     | 0.85 (0.52 to 1.38) | 0.74 (0.46 to 1.19) | 0.63 (0.39 to 1.04) | 0.91 (0.49 to 1.68) | 0.57                      |
| Women (N = 4105)                   | 1.00                     | 0.49 (0.15 to 1.55) | 0.36 (0.12 to 1.10) | 0.65 (0.17 to 2.45) | 0.25 (0.03 to 2.26) |                           |
| <b>Smoking status</b>              |                          |                     |                     |                     |                     |                           |
| Non-current smoker (N = 17 553)‡   | 1.00                     | 0.73 (0.45 to 1.20) | 0.63 (0.39 to 1.02) | 0.57 (0.34 to 0.95) | 0.75 (0.36 to 1.58) | 0.99                      |
| Current smoker (N = 7585)          | 1.00                     | 0.92 (0.32 to 2.63) | 0.82 (0.29 to 2.30) | 0.71 (0.25 to 2.00) | 0.97 (0.31 to 3.00) |                           |
| <b>Alcohol consumption</b>         |                          |                     |                     |                     |                     |                           |
| Non-drinker (N = 2412)             | 1.00                     | 0.42 (0.15 to 1.18) | 0.65 (0.24 to 1.78) | 0.65 (0.21 to 2.04) | 0.21 (0.04 to 1.23) | 0.19                      |
| Drinker (N = 22 101)               | 1.00                     | 0.90 (0.54 to 1.50) | 0.76 (0.46 to 1.24) | 0.65 (0.39 to 1.09) | 1.01 (0.54 to 1.88) |                           |
| <b>BMI, kg/m<sup>2</sup></b>       |                          |                     |                     |                     |                     |                           |
| <25 (N = 15 282)                   | 1.00                     | 0.71 (0.40 to 1.27) | 0.54 (0.30 to 0.94) | 0.58 (0.32 to 1.05) | 0.80 (0.36 to 1.76) | 0.39                      |
| ≥ 25 (N = 9856)                    | 1.00                     | 0.91 (0.45 to 1.83) | 0.91 (0.46 to 1.81) | 0.65 (0.32 to 1.31) | 0.88 (0.38 to 2.04) |                           |
| <b>Diabetes status</b>             |                          |                     |                     |                     |                     |                           |
| No (N = 23 627)                    | 1.00                     | 0.83 (0.51 to 1.35) | 0.71 (0.44 to 1.14) | 0.64 (0.39 to 1.04) | 0.84 (0.45 to 1.57) | 0.85                      |
| Yes (N = 1511)                     | 1.00                     | 0.61 (0.20 to 1.86) | 0.69 (0.23 to 2.06) | 0.73 (0.23 to 2.32) | 0.96 (0.25 to 3.77) |                           |
| <b>Hypertension status</b>         |                          |                     |                     |                     |                     |                           |
| No (N = 20 960)                    | 1.00                     | 0.73 (0.42 to 1.27) | 0.66 (0.39 to 1.14) | 0.68 (0.39 to 1.18) | 0.91 (0.45 to 1.83) | 0.55                      |
| Yes (N = 4178)                     | 1.00                     | 1.06 (0.51 to 2.21) | 0.90 (0.44 to 1.84) | 0.66 (0.31 to 1.39) | 1.02 (0.39 to 2.66) |                           |
| <b>Hypercholesterolemia status</b> |                          |                     |                     |                     |                     |                           |
| No (N = 18 631)                    | 1.00                     | 0.77 (0.44 to 1.35) | 0.63 (0.37 to 1.09) | 0.57 (0.32 to 1.00) | 0.82 (0.39 to 1.72) | 0.99                      |
| Yes (N = 6507)                     | 1.00                     | 0.71 (0.34 to 1.48) | 0.66 (0.32 to 1.37) | 0.55 (0.26 to 1.17) | 0.73 (0.30 to 1.81) |                           |

Note: Models were adjusted for the same covariates used in model 2 (Table 2).

\* Derived from robust Tobit regression models using  $\log_e(\text{CAC}+1)$  as the outcome.

† Calculated using Wald tests.

‡ Non-current smoker included never and past smokers.
